# Supplementary material for: A Look Inside HIV Resistance through Retroviral Protease Interaction Maps
Source: PLOS journal article supplement (doi:10.1371/journal.pcbi.0030048), 2007-03-06
Supplement: S1 (10.1371/journal.pcbi.0030048.s001) [file journal.pcbi.0030048.s001]

**Figure S1.** Structural alignment of nine wild-type retroviral proteases*. Amino acid residues highlighted in red are conserved among all proteases. Residues highlighted in blue cannot be structurally aligned between all proteases. Residues highlighted in yellow (85 amino acids) were the ones considered in the study.

**10 20 30 40 50**

│││││

HIV-1 -------PQITLW--QRPLVTIRIG----------GQLKEALLDTGADDTVLEE--M--N--LPGKWK--PKMIGGI

HIV-2 -------PQFSLW--KRPVVTAHIE----------GQPVEVLLDTGADDSIVAG--I--E--LGNNYS--PKIVGGI

RSV -------LAMTMEHKDRPLVRVILTNTGSHPVKQRSVYITALLDSGADITIISEEDWP---TDWPVMEAANPQIHGI

AMV -------LAMTMEHKDRPLVRVILTNTGSHPVKQRSVYITALLDSGADITIISEEDWP---ADWPVMEAANPQIHGI

FIV --YNKVGTTTTLE--KRPEILIFVN----------GYPIKFLLDTGADITILNRRDFQ-VKN-SIENG--RQNMIGV

HTLV-1 -------PVIPLDPARRPVIKAQVDTQTSHP-----KTIEALLDTGADMTVLPIALFS----SNTPLK--NTSVLGA

Mo-MuLV TLDDQGGQGQDPP--PEPRITLKVG----------GQPVTFLVDTGAQHSVLTQ--N--P--GPLSDK--SAWVQGA

BLV -------LSIPLA-RSRPSVAVYLSGPWLQP---SQNQALMLVDTGAENTVLPQNWLV----RDYPRI--PAAVLGA

EIAV -------VTYNLE--KRPTTIVLIN----------DTPLNVLLDTGADTSVLTTAHYNRLKYRGRKYQ--GTGIGGV

**60 70 80 90**

││││

HIV-1 GGFIKVRQY--DQIPVEICG------HKAIGTVLVG----PTPVNIIGRNLLTQIGCTLNF------------------

HIV-2 GGFINTKEY--KNVEIEVLN------KKVRATIMTG----DTPINIFGRNILTALGMSLNL------------------

RSV GGGIPMRKS-RDMIELGVINRDGSLERPLLLFPAVA----MVRGSILGRDCLQGLGLRLTNL-----------------

AMV GGGIPMRKS-RDMIEVGVINRDGSLERPLLLFPAVA----MVRGSILGRDCLQGLGLRLTNL-----------------

FIV GGGKRGTNY--INVHLEIRDENYKT-QCIFGNVCVL-EDNSLIQPLLGRDNMIKFNIRLVM------------------

HTLV-1 GGQTQDHFK-LTSLPVLIRLPFRT-TPIVLTSCLV---DTKNNWAIIGRDALQQCQGVLYLPEAKGPPVIL--------

Mo-MuLV TGGKRYRWT--TDRKVHLAT------GKVTHSFLHV---PDCPYPLLGRDLLTKLKAQIHFEGSGAQVMGPMGQPLQVL

BLV GGVSRNRYN-WLQGPLTLALKPEG-PFITIPKILV---DTFDKWQILGRDVLSRLQASISIPEEVRPPMVG--------

EIAV GGNVETFST--P-VTIKKKG------RHIKTRMLVA----DIPVTILGRDILQDLGAKLVL------------------

* Taken from: Bagossi P, Sperka T, Feher A, Kadas J, Zahuczky G et al. (2005) Amino acid preferences for a critical substrate binding subsite of retroviral proteases in type 1 cleavage sites. J. Virol. 79: 4213-4218.
