# Supplementary material for: A Look Inside HIV Resistance through Retroviral Protease Interaction Maps
Source: PLOS journal article supplement (doi:10.1371/journal.pcbi.0030048), 2007-03-06
Supplement: S1 (10.1371/journal.pcbi.0030048.s001) [file journal.pcbi.0030048.s001]

**Table S1.** Summary of the data set for retroviral proteases used herein. References to publications, description of the data considered under the study and the number of entries each article added to the data set are shown.

| **Reference** | **Description** | **Nr. of entries to the data set** |
| --- | --- | --- |
| [32] | Table 2. All experimentally determined kcat/Km values Table 3. kcat/Km values of P1F, P4’H, P1I and P4V substrates for AMV protease Table 3. All kcat/Km values for RSV protease mutants R10K, L12V, I108V, I71V and I44V | 76 |
| [33] | Table I. All kcat/Km values, except for P3F and P2H substituted substrates. Table II. All kcat/Km values except for P3R, P3F, P1L, P1H, P1G and P1F substituted substrates | 57 |
| [34] | Table III. kcat/Km values of P3R, P3F, P1L, P1H and P1G substituted substrates for AMV protease and RSV protease mutants (R105P+G106V and H65G+R105P+G106V). kcat/Km values of P1W for RSV protease mutants | 20 |
| [35] | Table 1. All experimentally determined kcat/Km values | 8 |
| [36] | Table V. kcat/Km value of RSV NC-RT substrate for HIV-2 protease and kcat/Km values of HIV-1 RT-IN substrate for AMV protease and RSV protease mutants (R105P+G106V; H65G+R105P+G106V) | 4 |
| [37] | Tables I-III. All experimentally determined kcat/Km values | 44 |
| [38] | Table II. All experimentally determined kcat/Km values | 22 |
| [39] | Table I. All kcat/Km values except for MA-p2 and NC-PR substrates. Table II. All kcat/Km values except for RT-IN substrate Table III. All kcat/Km values except for MA-p2, NC-RT and PR-RT substrates. p2-p10 substrate is included Table VI. All kcat/Km values except for PYVGSGLY(RR) substrate | 17 |
| [40] | Table I. kcat/Km values for AMV protease and MA/p2A, p10/CA, CA/p3, p3/NC, PR/RT, MA/CA substrates. Non-cleavable substrates p10/CA and IN/p4 for HIV-1 protease. | 8 |
| [41] | Table 1. All kcat/Km values. Table 2. kcat/Km values for AMV protease and peptides Nr.10 and 12 | 5 |
| [42] | Table 1. All kcat/Km values for BLV protease. kcat/Km value for peptide in the “**c**”note | 7 |
| [43] | Table 1. kcat/Km values for experiments Nr.2-12 (high ionic strength) and Nr.10-12 (low ionic strength) Table 2. kcat/Km values for experiments Nr. 14-16, 18, 20, 21 Table 3. kcat/Km value for HIV-2 protease and VSQNY*PEVQ substrate. Non-cleavable substrates SQNYPEVQ and SQNYPQVQ for MuLV and EIAV proteases Table 4. All kcat/Km values except for HIV-1 protease | 34 |
| [44] | Table I. kcat/Km value for experiment Nr.2 Table II. kcat/Km values are calculated from kcat and Km values for EIAV protease and MA/CA, NC/p9, PR/RT. Non-cleavable substrate P15pol/IN is also considered for EIAV protease. Table III. All kcat/Km values. (Calculated from the corresponding kcat and Km values) | 8 |
| [45] | Table 5. All kcat/Km values except for HIV-1 protease | 8 |
| [46] | Table I. All kcat/Km values except for HTLV-1 (wt) protease and CA/NC substrate experiment Table II. All kcat/Km values | 14 |
| [47] | Table II. All kcat/Km values from “Series A” group, except for P3Q substrates Table III. All kcat/Km values for HIV-1 and HIV-2 proteases Table IV. All kcat/Km values for HIV-1 and HIV-2 proteases Non-cleavable substrate with P2K for HIV-1 and HIV-2 proteases is included Table V. All kcat/Km values for HIV-1 and HIV-2 proteases. Non-cleavable substrate with P2’K for HIV-1 and HIV-2 proteases is included Table VI. All kcat/Km values for HIV-1 and HIV-2 proteases. Non-cleavable substrates with P1X (X=V, I, P, S, D, K or G) substitutions for HIV-1 and HIV-2 proteases are included | 67 |
| [48] | Table I. All kcat/Km values except for Nr. 3 and 5 Table III. All kcat/Km values except for Nr. 26 and 29 Table V. All kcat/Km values except for Nr.17, 44 and 47. Nr.32 is included Table VI. All kcat/Km values | 47 |
| [49] | Table I. All experiments included except “i”, “v” and “xi” for HIV-1 protease and “i” for HIV-2 protease Table II. All experiments included except “xiii” and “xx” for HIV-1 protease | 36 |
| [50] | Table I. Experiments included for HTLV-1 protease: Nr. 1-33, 35-46. Experiments included for HIV-1 protease: Nr. 11, 18-23, 27-33, 35-46, 49. kcat/Km is considered 0.01 for HTLV-1 protease substrates Nr. 20 and 22. kcat/Km is considered 100 for HIV-1 protease substrate Nr. 27 | 72 |
| [51] | Table 1. All kcat/Km values | 27 |
| [52] | Table 1. All kcat/Km values except for wild-type HIV-1 protease Table 2. kcat/Km values calculated from the individual Km and kcat values under note “a” Table 3. All kcat/Km values except for wild-type HIV-1 protease substrate Nr.1 Table 4. All kcat/Km values except for wild-type HIV-1 protease substrate Nr.7 and for HIV-1 protease mutant (I84V) substrate Nr.9 | 88 |
| [53] | Table I. All kcat/Km values except for wild-type HIV-1 protease CA-p2 and P6pol-PR substrates | 8 |
| [54] | Table II. kcat/Km value for substrate SP-2014 Table III. All kcat/Km values. (kcat/Km =0.001 was set for substrates SP-2177 and SP-2179). 15 non-cleavable substrates described under “c” note are included | 59 |
| [55] | Table II. All kcat/Km values except for “wild-type” and “NT” proteases Table III. All kcat/Km values except for “wild-type” protease | 20 |
| [56] | Table 2. All kcat/Km values except for “RSV GGGG-PR” protease substrate SP1Y | 10 |
| [57] | Table I. All kcat/Km values for RSV (S9) protease | 5 |
| [58] | Table 2. All kcat/Km values for HTLV-1 protease. kcat/Km values for HIV-1 protease VSQVY*PIVQ and VSQIY*PIVQ substrates Table 3. All kcat/Km values except for substrates KTKVL*VVQPK and KVL*VVQPK. All experiments marked “Not cleaved” are included as non-cleavable substrates | 77 |
| [59] | Table 2. Wild type HIV-1 protease non-cleavable substrates SQNYAIVQ, SQNYDIVQ and SQNYKIVQ are included. | 3 |
| [60] | Supplemental material table I. HIV-2 protease non-cleavable peptides ETTALVCD and AECFRIFD are included | 2 |
| [61] | Table 1. Four cleavage sites were observed cleaving fully denaturated human vimentin by HIV-1 protease. The non-cleavable octamers were extracted from five non-cleavable vimentin oligopeptides fragments between the cleavage sites by using an eight-residue-long sliding window. The first oligopeptide (52 amino acids) yielded in 45 non-cleavable octamers. The second fragment (9 amino acids) - 2 octamers, the third (32 amino acids) - 25 octamers, the forth (330 amino acids) - 323 octamers and the fifth (43 amino acids) - 36 octamers. (Sequence details were taken from <http://www.prospec.co.il/~prospec/cart/catalog/rHuVim.html>, Blast search: Homo sapiens: 7431, Vimentin) | 431 |
| [62] | Figure 1. Non-cleavable octamers were extracted from the RT sequence using an eight-residue-long sliding window. The following oligopeptides were considered: “-15...38” ***** (53 amino acids, 46 octamers), “39...87” (49 amino acids, 42 octamers), “88...115” (28 amino acids, 21 octamers), “116...231” (116 amino acids, 109 octamers), “232...303” (72 amino acids, 65 octamers), “304...325” (22 amino acids, 15 octamers), “326...436” (111 amino acids, 104 octamers), “441...483” (43 amino acids, 36 octamers), “484...494” (11 amino acids, 4 octamers), “495...532” (38 amino acids, 31 octamers), “533...560” (28 amino acids, 21 octamers) and a part of RNase H “PIHDHDHPFHGYQLEKEP” (18 amino acids, 11 octamers) ***** the numbers in brackets correspond to amino acid positions in RT sequence in figure 1 | 505 |
| [63] | Table II. All non-cleavable octamers | 239 |
| [64] | A denaturated hen egg lysozyme (129 amino acids, see [63]) is tolerant to HIV-2 protease cleavage. 122 non-cleavable octamers were extracted from the protein using an eight-residue-long sliding window | 122 |
| See Materials and Methods | Substrates Nr. 1-3 for HXB2 and 3 mutant (I84V, L90M and I84V+L90M) HIV-1 protease from Table 3 | 12 |
